# Supplementary material for: A serotonergic axon-cilium synapse drives nuclear signaling to alter chromatin accessibility
Source: PubMed Central journal article supplement (PMC9789380; doi:10.1016/j.cell.2022.07.026), 2022-09-01
Supplement: NIHMS1851533-supplement-Methods_S1.pdf [file NIHMS1851533-supplement-Methods_S1.pdf]

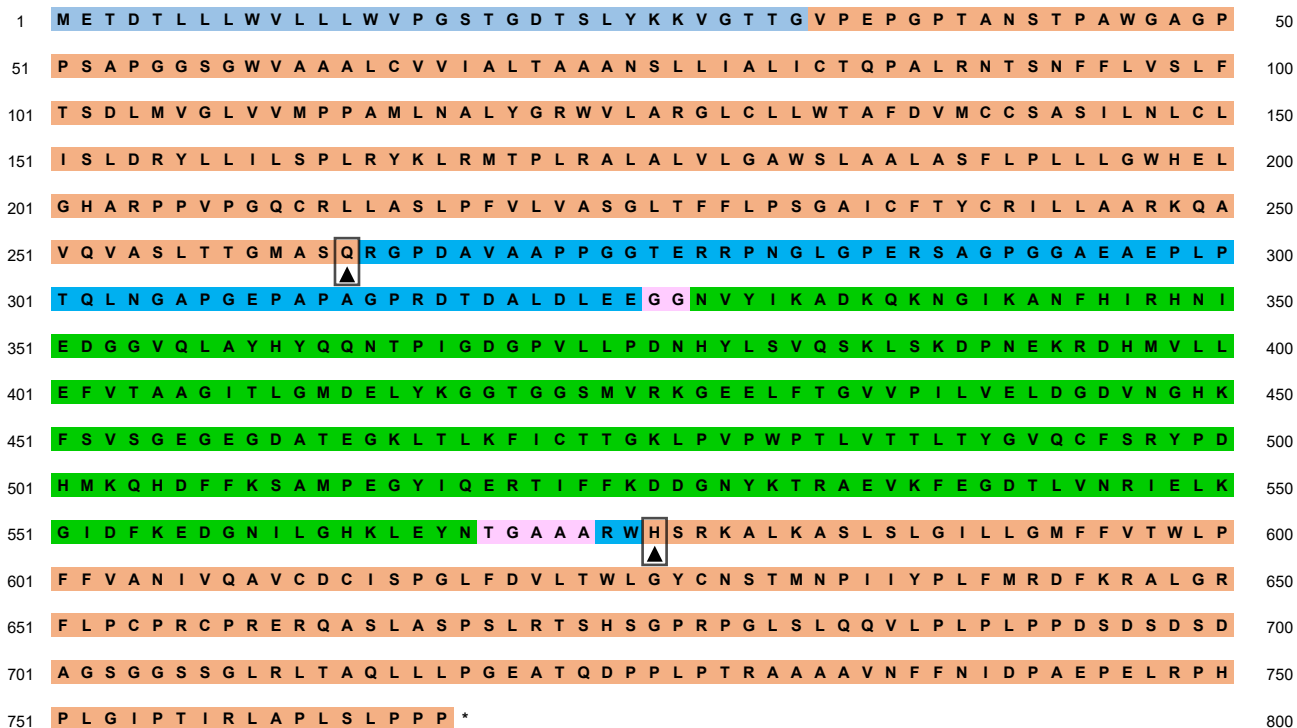

**Methods S1.** The amino acid sequence of the HTR6-PM sensor. Related to STAR Methods. The numbering starts from the IgK leader sequence. Insertion sites Q263ICL3 and H5766.26 are indicated by black arrowheads. Asterisk indicates the stop codon.
